# Supplementary material
Source: PubMed Central journal article supplement (PMC5437744)
Supplement: NIHMS852164-supplement-Supp2.pdf [file NIHMS852164-supplement-Supp2.pdf]

| Patient | Age at visit (yrs, mos) | M/F | Race             | Ethnicity              | Symptom duration (yrs) | Blood Pressure at first visit (mmHg) | Body Mass Index (kg/m <sup>2</sup> ) | Avg 24hr UFC (nmol/24 hrs) over D1+D2 | Avg UFC/BSA (nmol/24 hrs/m <sup>2</sup> ) over D1+D2 | Avg Urinary 17OHS/Cr (mmol/mol Cr/24 hrs) over D1+D2 | Avg midnight Plasma ACTH (pmol/L) | Avg early morning Plasma ACTH (pmol/L) | Avg midnight serum hydrocortisol (nmol/L) | Avg early morning serum hydrocortisol (nmol/L) | Proximal 1 cm hair (pmol/g hair) | Medial 1 cm hair (pmol/g hair) | Distal 1 cm hair (pmol/g hair) | Average of all 3-cm hair (pmol/g hair) | Median of all 3-cm hair (pmol/g hair) | Surgical procedure                                                 | Pathology results                                                               | Final diagnosis                                                                                              |
|---------|-------------------------|-----|------------------|------------------------|------------------------|--------------------------------------|--------------------------------------|---------------------------------------|------------------------------------------------------|------------------------------------------------------|-----------------------------------|----------------------------------------|-------------------------------------------|------------------------------------------------|----------------------------------|--------------------------------|--------------------------------|----------------------------------------|---------------------------------------|--------------------------------------------------------------------|---------------------------------------------------------------------------------|--------------------------------------------------------------------------------------------------------------|
| 1       | 66                      | M   | Caucasian        | Not Hispanic or Latino | 10                     | 166/87                               | 28.9                                 | 299.7                                 | 140.4                                                | 2.3                                                  | 6.3                               | 7.5                                    | 281.4                                     | 295.2                                          | 60.1                             | 44.3                           | 45.4                           | 49.9                                   | 45.4                                  | Right adrenalectomy                                                | Right adrenal nodular cortical hyperplasia                                      | Primary hyperaldosteronism and Cushing's Syndrome due to co-secreting right adrenal adenoma                  |
| 2       | 44                      | F   | Caucasian        | Not Hispanic or Latino | 7                      | 127/63                               | 25.0                                 | 40.1                                  | 22.5                                                 | 1.2                                                  | 1.2                               | 4.7                                    | 45.5                                      | 434.5                                          | 42.9                             | 85.9                           | 224.7                          | 117.8                                  | 85.9                                  | Not done                                                           | Not done                                                                        | Non-functioning left adrenal adenoma                                                                         |
| 3       | 38                      | F   | Caucasian        | Not Hispanic or Latino | 14                     | 141/80                               | 35.9                                 | 21.9                                  | 12.2                                                 | 1.6                                                  | 1.1                               | 1.1                                    | 183.5                                     | 186.2                                          | 37.3                             | 28.3                           | 20.6                           | 28.7                                   | 28.3                                  | Left adrenalectomy                                                 | Left adrenocortical adenoma                                                     | Subclinical Cyclical Cushing's Syndrome due to left adrenocortical adenoma                                   |
| 4       | 50                      | F   | Caucasian        | Not Hispanic or Latino | 12                     | 158/86                               | 29.9                                 | 163.3                                 | 85.6                                                 | 3.0                                                  | 1.3                               | 1.5                                    | 328.3                                     | 315.9                                          | 38.6                             | 11.9                           | 16.0                           | 22.2                                   | 16.0                                  | Bilateral adrenalectomy                                            | Bilateral diffuse macronodular adrenocortical hyperplasia                       | Cushing's Syndrome due to bilateral adrenocortical macronodular hyperplasia                                  |
| 5       | 40                      | F   | Caucasian        | Not Hispanic or Latino | 1.50                   | 125/72                               | 36.0                                 | 197.8                                 | 84.8                                                 | 2.2                                                  | 1.1                               | 1.1                                    | 166.9                                     | 391.7                                          | 49.7                             | 44.7                           | 49.7                           | 48.0                                   | 49.7                                  | Bilateral adrenalectomy                                            | Bilateral macronodular adrenocortical hyperplasia                               | Cushing's Syndrome due to bilateral adrenocortical macronodular hyperplasia                                  |
| 6       | 50                      | F   | Caucasian        | Not Hispanic or Latino | 3                      | 134/69                               | 42.5                                 | 46.5                                  | 23.2                                                 | 1.7                                                  | 1.1                               | 1.1                                    | 92.4                                      | 209.7                                          | 4,113.4                          | 7,574.6                        | 4,518.9                        | 5,402.3                                | 4,518.9                               | Right adrenalectomy                                                | Right adrenocortical adenoma                                                    | Cushing's Syndrome due to right adrenocortical adenoma                                                       |
| 7       | 56                      | F   | African American | Hispanic or Latino     | 4                      | 156/90                               | 44.7                                 | 300.3                                 | 158.4                                                | 4.0                                                  | 1.2                               | 1.1                                    | 440.0                                     | 463.5                                          | 49.4                             | 33.9                           | 30.6                           | 38.0                                   | 33.9                                  | Bilateral adrenalectomy                                            | Bilateral multinodular adrenocortical hyperplasia                               | Cushing's Syndrome due to bilateral multinodular adrenal hyperplasia                                         |
| 8       | 14 yr 10 mo             | M   | Caucasian        | Not Hispanic or Latino | 1                      | 109/63                               | 33.3 (>97%ile)                       | 147.2                                 | 63.5                                                 | 2.3                                                  | 2.3                               | 4.9                                    | 27.6                                      | 226.2                                          | 33.4                             | 29.8                           | 18.5                           | 27.2                                   | 29.8                                  | Not done                                                           | Not done                                                                        | Obesity and insulin resistance                                                                               |
| 9       | 15 yr 7 mo              | F   | Caucasian        | Not Hispanic or Latino | 1.50                   | 123/71                               | 23.1 (75-85%ile)                     | 13.2                                  | 9.1                                                  | 1.3                                                  | 3.9                               | 4.6                                    | 27.6                                      | 110.4                                          | 82.8                             | 137.7                          | 276.2                          | 165.5                                  | 137.7                                 | Transsphenoidal resection                                          | Pituitary adenoma, ACTH-positive                                                | Resolved Cushing's Disease status-post transsphenoidal resection                                             |
| 10      | 6 yr 4 mo               | F   | Caucasian        | Hispanic or Latino     | 2.17                   | 122/71                               | 29.2 (>97%ile)                       | 461.0                                 | 458.3                                                | 8.4                                                  | 9.4                               | 6.9                                    | 353.1                                     | 393.1                                          | 50.0                             | 48.0                           | 51.3                           | 49.8                                   | 50.0                                  | Transsphenoidal resection                                          | Pituitary adenoma, ACTH-positive                                                | Cushing's Disease                                                                                            |
| 11      | 43                      | F   | Asian            | Not Hispanic or Latino | 3                      | 111/66                               | 33.5                                 | 63.7                                  | 33.0                                                 | 2.0                                                  | 1.1                               | 1.3                                    | 212.4                                     | 253.8                                          | 67.9                             | 55.6                           | 66.5                           | 63.4                                   | 66.5                                  | Right adrenalectomy                                                | Right adrenocortical adenoma                                                    | Cushing's Syndrome due to right adrenocortical adenoma                                                       |
| 12      | 54                      | F   | Caucasian        | Not Hispanic or Latino | 4                      | 130/75                               | 45.4                                 | 130.5                                 | 63.9                                                 | 2.9                                                  | 1.6                               | 1.7                                    | 110.4                                     | 257.9                                          | 28.3                             | 24.2                           | 19.5                           | 24.0                                   | 24.2                                  | Right adrenalectomy                                                | Right adrenocortical adenoma                                                    | Cushing's Syndrome due to right adrenocortical adenoma                                                       |
| 13      | 7 yr 3 mo               | F   | Caucasian        | Not Hispanic or Latino | 2.25                   | 106/63                               | 35.4 (>97%ile)                       | 528.3                                 | 472.7                                                | 6.7                                                  | 6.3                               | 7.0                                    | 263.5                                     | 442.8                                          | 89.0                             | 57.6                           | 47.7                           | 64.8                                   | 57.6                                  | Transsphenoidal resection                                          | Pituitary adenoma, ACTH-positive                                                | Cushing's Disease                                                                                            |
| 14      | 48                      | F   | Asian            | Not Hispanic or Latino | 2                      | 169/89                               | 22.4                                 | 2,011.6                               | 1,400.7                                              | 10.6                                                 | 27.7                              | 24.4                                   | 859.4                                     | 851.1                                          | 181.9                            | 196.7                          | 163.5                          | 180.7                                  | 181.9                                 | Transsphenoidal resection                                          | Pituitary adenoma, ACTH-positive                                                | Cushing's Disease                                                                                            |
| 15      | 17 yr 1 mo              | F   | Caucasian        | Not Hispanic or Latino | 3                      | 137/88                               | 36.0 (>97%ile)                       | 584.7                                 | 350.7                                                | 6.7                                                  | 8.8                               | 9.3                                    | 648.3                                     | 525.6                                          | 73.8                             | 45.2                           | 39.8                           | 52.9                                   | 45.2                                  | Transsphenoidal resection                                          | Pituitary adenoma, ACTH-positive                                                | Cushing's Disease                                                                                            |
| 16      | 13 yr 6 mo              | F   | Caucasian        | Hispanic or Latino     | 1                      | 117/88                               | 21.7 (75-85%ile)                     | 1,804.8                               | 1,357.2                                              | 13.6                                                 | 14.3                              | 14.7                                   | 656.6                                     | 881.4                                          | 225.9                            | 670.4                          | 1,120.9                        | 672.4                                  | 670.4                                 | Radical right lower lobectomy and mediastinal lymph node resection | Bronchogenic carcinoid tumor, ACTH-producing                                    | Ectopic Cushing's Syndrome due to ACTH-producing right bronchogenic carcinoid tumor                          |
| 17      | 64                      | F   | Caucasian        | Not Hispanic or Latino | 0.25                   | 108/66                               | 28.7                                 | 13.9                                  | 7.9                                                  | 1.7                                                  | 2.0                               | 2.1                                    | 27.6                                      | 29.0                                           | 19.4                             | 29.8                           | 28.5                           | 25.9                                   | 28.5                                  | Not done                                                           | Not done                                                                        | Non-secreting pituitary macroadenoma complicated by central hypothyroidism and central adrenal insufficiency |
| 18      | 21                      | M   | Caucasian        | Not Hispanic or Latino | 1                      | 159/118                              | 33.4                                 | 5,527.1                               | 2,739.4                                              | 8.3                                                  | 26.4                              | 17.3                                   | 688.3                                     | 566.9                                          | 719.4                            | 731.2                          | 568.1                          | 672.9                                  | 719.4                                 | Thymectomy, lymph node resection, and bilateral adrenalectomy      | Thymic neuroendocrine tumor, ACTH-producing; Diffuse adrenocortical hyperplasia | Ectopic Cushing's Syndrome due to ACTH-producing thymic neuroendocrine tumor                                 |
| 19      | 26                      | F   | Caucasian        | Not Hispanic or Latino | 9                      | 128/76                               | 57.9                                 | 184.6                                 | 76.4                                                 | 4.4                                                  | 71.9                              | 62.5                                   | 204.2                                     | 280.0                                          | 91.0                             | 70.8                           | 71.8                           | 77.8                                   | 71.8                                  | Transsphenoidal resection                                          | Pituitary adenoma, ACTH-positive                                                | Cushing's Disease                                                                                            |
| 20      | 60                      | M   | Caucasian        | Not Hispanic or Latino | 1.50                   | 127/63                               | 32.8                                 | 271.3                                 | 138.1                                                | 3.0                                                  | 53.5                              | 7.7                                    | 253.8                                     | 438.6                                          | 95.7                             | 108.7                          | 81.1                           | 95.2                                   | 95.7                                  | Transsphenoidal resection                                          | Pituitary adenoma, ACTH-positive                                                | Cushing's Disease                                                                                            |
| 21      | 16 yr 6 mo              | F   | Caucasian        | Not Hispanic or Latino | 2                      | 113/56                               | 38.9 (>97%ile)                       | 30.3                                  | 16.3                                                 | 1.4                                                  | 3.7                               | 5.6                                    | 40.0                                      | 280.0                                          | 44.7                             | 31.9                           | 30.6                           | 35.7                                   | 31.9                                  | Not done                                                           | Not done                                                                        | Depression                                                                                                   |
| 22      | 9 yr 9 mo               | M   | Unknown          | Hispanic or Latino     | 2.75                   | 129/69                               | 28.2 (>97%ile)                       | 613.8                                 | 517.8                                                | 4.6                                                  | 19.1                              | 19.3                                   | 456.6                                     | 521.4                                          | 134.3                            | 103.1                          | 85.0                           | 107.4                                  | 103.1                                 | Transsphenoidal resection                                          | Pituitary adenoma, ACTH-positive                                                | Cushing's Disease                                                                                            |
| 23      | 10 yr 2 mo              | F   | Unknown          | Hispanic or Latino     | 2.50                   | 120/74                               | 24.6 (97%ile)                        | 1,007.1                               | 804.8                                                | 5.7                                                  | 5.6                               | 5.3                                    | 595.9                                     | 640.0                                          | 184.0                            | 160.8                          | 85.0                           | 143.3                                  | 160.8                                 | Transsphenoidal resection                                          | Pituitary adenoma, ACTH-positive                                                | Cushing's Disease                                                                                            |
| 24      | 16 yr 8 mo              | F   | Asian            | Not Hispanic or Latino | 2.83                   | 126/80                               | 28.6 (90-95%ile)                     | 299.5                                 | 171.4                                                | 4.4                                                  | 2.6                               | 5.6                                    | 154.5                                     | 440.0                                          | 142.5                            | 120.9                          | 80.2                           | 114.5                                  | 120.9                                 | Transsphenoidal resection                                          | Pituitary adenoma, ACTH-positive                                                | Cushing's Disease                                                                                            |
| 25      | 12 yr 0 mo              | M   | Caucasian        | Not Hispanic or Latino | 1                      | 136/80                               | 23.7 (90-95%ile)                     | 1,399.5                               | 978.4                                                | 8.9                                                  | 9.0                               | 7.2                                    | 899.4                                     | 495.2                                          | 164.7                            | 137.9                          | 125.2                          | 142.6                                  | 137.9                                 | Transsphenoidal resection                                          | Pituitary adenoma, ACTH-positive                                                | Cushing's Disease                                                                                            |
| 26      | 9 yr 9 mo               | F   | Caucasian        | Not Hispanic or Latino | 1.50                   | 127/77                               | 27.9 (>97%ile)                       | 405.8                                 | 349.5                                                | 5.2                                                  | 2.9                               | 10.0                                   | 506.2                                     | 451.1                                          | 35.0                             | 21.2                           | 17.6                           | 24.6                                   | 21.2                                  | Transsphenoidal resection                                          | Pituitary adenoma, ACTH-positive                                                | Cushing's Disease                                                                                            |
| 27      | 15 yr 3 mo              | F   | Caucasian        | Not Hispanic or Latino | 0.75                   | 126/86                               | 26.0 (90-95%ile)                     | 2,186.5                               | 1,355.6                                              | 9.1                                                  | 14.6                              | 10.0                                   | 847.0                                     | 794.5                                          | 49.1                             | 11.9                           | 14.1                           | 25.0                                   | 14.1                                  | Transsphenoidal resection                                          | Pituitary adenoma, ACTH-positive                                                | Cushing's Disease                                                                                            |
| 28      | 14 yr 8 mo              | F   | Caucasian        | Not Hispanic or Latino | 0.60                   | 124/67                               | 23.3 (75-85%ile)                     | 48.7                                  | 28.6                                                 | 2.2                                                  | 1.2                               | 9.9                                    | 31.7                                      | 478.7                                          | 10.2                             | 5.5                            | 5.2                            | 7.0                                    | 5.5                                   | Not done                                                           | Not done                                                                        | Irritable Bowel Syndrome and dysmenorrhea                                                                    |
| 29      | 17 yr 6 mo              | F   | Caucasian        | Hispanic or Latino     | 4.00                   | 153/95                               | 27.2 (90-95%ile)                     | 1,846.9                               | 1,095.9                                              | 7.1                                                  | 5.6                               | 4.0                                    | 623.5                                     | 325.5                                          | 150.4                            | 87.2                           | 109.0                          | 115.5                                  | 109.0                                 | Transsphenoidal resection                                          | Pituitary adenoma, ACTH-positive                                                | Cushing's Disease                                                                                            |
| 30      | 27                      | F   | Unknown          | Hispanic or Latino     | 0.75                   | 144/94                               | 36.6                                 | 1,408.6                               | 770.9                                                | 7.7                                                  | Not done                          | Not done                               | 633.1                                     | 631.8                                          | 141.0                            | 53.2                           | 23.4                           | 72.6                                   | 53.2                                  | Transsphenoidal resection                                          | Pituitary adenoma, ACTH-positive                                                | Cushing's Disease                                                                                            |
| 31      | 6 yr 1 mo               | F   | Caucasian        | Not Hispanic or Latino | 0.75                   | 114/75                               | 29.8 (>97%ile)                       | 683.8                                 | 727.9                                                | 7.7                                                  | 4.7                               | 3.0                                    | 311.7                                     | 384.9                                          | 42.2                             | 18.2                           | 8.6                            | 23.0                                   | 18.2                                  | Transsphenoidal resection                                          | Pituitary adenoma, ACTH-positive                                                | Cushing's Disease                                                                                            |
| 32      | 14 yr 11 mo             | M   | Caucasian        | Not Hispanic or Latino | 1                      | 151/80                               | 31.6 (>97%ile)                       | 2,109.7                               | 1,114.3                                              | 5.7                                                  | 7.1                               | 11.3                                   | 558.7                                     | 667.6                                          | 187.6                            | 165.3                          | 121.7                          | 158.2                                  | 165.3                                 | Transsphenoidal resection                                          | Pituitary adenoma, ACTH-positive                                                | Cushing's Disease                                                                                            |
| 33      | 13 yr 8 mo              | M   | Caucasian        | Not Hispanic or Latino | 1                      | 128/60                               | 27.3 (95-97%ile)                     | 2,450.5                               | 1,618.0                                              | 6.8                                                  | 13.9                              | 19.4                                   | 711.8                                     | 718.7                                          | 178.8                            | 68.4                           | 32.8                           | 93.3                                   | 68.4                                  | Transsphenoidal resection                                          | Pituitary adenoma, ACTH-positive                                                | Cushing's Disease                                                                                            |
| 34      | 16 yr 3 mo              | F   | African American | Not Hispanic or Latino | 4.50                   | 130/83                               | 38.0 (>97%ile)                       | 866.8                                 | 451.0                                                | 5.8                                                  | 9.0                               | 12.1                                   | 467.6                                     | 669.0                                          | 235.6                            | 147.0                          | 109.2                          | 164.0                                  | 147.0                                 | Transsphenoidal resection                                          | Pituitary adenoma, ACTH-positive                                                | Cushing's Disease                                                                                            |
| 35      | 11 yr 7 mo              | M   | Caucasian        | Hispanic or Latino     | 4                      | 129/85                               | 23.8 (90-95%ile)                     | 449.7                                 | 359.8                                                | 4.2                                                  | 4.7                               | 2.0                                    | 326.9                                     | 311.7                                          | 315.9                            | 375.7                          | 430.6                          | 374.1                                  | 375.7                                 | Transsphenoidal resection                                          | Probable pituitary adenoma                                                      | Cushing's Disease                                                                                            |
| 36      | 16 yr 9 mo              | F   | African American | Not Hispanic or Latino | 8.75                   | 132/68                               | 38.7 (>97%ile)                       | 106.1                                 | 58.3                                                 | 2.3                                                  | 6.5                               | 10.5                                   | 230.4                                     | 256.6                                          | 64.8                             | 45.5                           | 48.0                           | 52.8                                   | 48.0                                  | Transsphenoidal resection                                          | Pituitary adenoma, ACTH-positive                                                | Cushing's Disease                                                                                            |
